# Supplementary material
Source: publisher figshare collection journal article supplement (https://tandf.figshare.com/ndownloader/files/22045359)
Supplement: Supplementary file 1 [file 22045359]

**Separation and Purification of Resveratrol from Polygonum Cuspidatum by Macroporous Adsorption Resin Mixed-bed Techology**

Weiwei Jia 1, 2, Zhenbin Chen 1, 2, *, Yingyu Zhao 1, 2, Songmei Ma 3, Duolong Di 4

*1School of Materials Science and Engineering, Lanzhou University of Technology, Lanzhou, China, 730050;*

*2State Key Laboratory of Gansu Advanced Non-ferrous Metal Materials, Lanzhou University of Technology, Lanzhou, China, 730050;*

*3School of Chemistry and Materials Science, Ludong University, Yantai, China, 264025;*

*4Key Laboratory of Chemistry of Northwestern Plant Resources and Key Laboratory for Natural Medicine of Gansu Province, Lanzhou, China, and Lanzhou Institute of Chemical Physics, Chinese Academy of Sciences, Lanzhou, China, 730050.*

Corresponding author: Zhenbin Chen

E-mail: [zhenbinchen@163.com](mailto:zhenbinchen@163.com)

Supplement table are shown in as follows:

**Supplement Table I** The physical properties of MAR

| MAR | Polarity | Structure | Specific surface area (m2 /g) | Average pore size (nm) | Moisturecontent (%) |
| --- | --- | --- | --- | --- | --- |
| LZ-49 | Non | SDVB | ≥850 | 15.0 | 67 |
| LZ-50 | Non | SDVB | ≥900 | 15.0 | 66 |
| LZ-52 | Non | SDVB | / | / | 63 |
| LZ-53 | Middle | SDVB | 577 | 10.0 | 72 |
| LZ-58 | Middle | Methacrylic | 754 | 7.3 | 72 |
| LZ-60 | Middle | Methacrylic | 575 | 7.4 | 63 |
| LZ-61 | Middle | SDVB | 700 | 16.5 | 72 |
| LZ-62 | Middle | SDVB | >1000 | 5.4 | 62 |
| LZ-63 | Middle | SDVB | ≥500 | 24.0 | 66 |
| LZ-64 | Non | SDVB | 993 | 6.9 | 66 |
| LZ-65 | Middle | Methacrylic | / | / | 72 |
| LZ-68 | Middle | / | / | 5.6 | 71 |
| LZ-72 | Middle | SDVB | 658 | 7.2 | 49 |
| LZ-73 | Non | SDVB | 350 | 18.0 | 54 |
| LZ-74 | Non | SDVB | ≥900 | 15.0 | 58 |
| LZ-75 | Strong | SDVB | 1000 | 9.0 | 61 |
| LZ-76 | Non | SDVB | 650-700 | 8.5 | 65 |
| LZ-77 | Non | SDVB | 800-870 | 5.5 | 58 |
| LZ-78 | Middle | SDVB | 500-550 | 7.5 | 61 |
| LZ-79 | Middle | SDVB | 500-550 | 11.5 | 68 |
| LZ-80 | Strong | SDVB | 500-600 | 7.7 | 70 |
| LZ-82 | Middle | SDVB | 650-700 | 8.5-9.0 | 64 |
| LZ-88 | Weak | SDVB | 400 | 20.0 | 64 |
| LZ-90 | Middle | Methacrylic | 450 | 14.5 | 70 |
| LZ-91 | Middle | Methacrylic | 660 | 9.0 | 69 |
| LZ-94 | Middle | SDVB | 600-700 | 7.0 | 56 |
| LZ-103 | Strong | / | / | / | 56 |
| LZ-105 | Strong | SDVB | 500-600 | 8.0 | 70 |
| LZ-106 | / | / | / | / | 56 |
| LZ-107 | / | / | / | / | 66 |
| LZ-111 | Weak | SDVB | / | / | 60 |
| LZ-114 | Strong | SDVB | ≥650 | 8.0 | 62 |

**Supplement Table II** The separation and purification performance of each MAR on resveratrol

| MAR | *Qa* (mg/g) | *F* (%) | *Qd* (mg/g) | *D* (%) | *SC* (%) |
| --- | --- | --- | --- | --- | --- |
| LZ-94 | 23.23 | 94.50 | 14.23 | 61.25 | 74.55 |
| LZ-78 | 23.37 | 95.09 | 13.91 | 59.50 | 73.74 |
| LZ-76 | 21.56 | 97.73 | 13.10 | 55.76 | 72.55 |
| LZ-64 | 23.05 | 93.78 | 13.07 | 56.71 | 71.54 |
| LZ-68 | 23.95 | 97.44 | 12.53 | 52.34 | 70.38 |
| LZ-77 | 22.99 | 93.54 | 12.36 | 53.76 | 69.67 |
| LZ-53 | 23.25 | 94.60 | 11.39 | 48.97 | 67.22 |
| LZ-62 | 22.96 | 93.41 | 11.28 | 49.14 | 66.85 |
| LZ-79 | 21.11 | 85.90 | 11.41 | 54.05 | 66.79 |
| LZ-82 | 22.17 | 90.21 | 11.34 | 51.14 | 66.77 |
| LZ-91 | 20.61 | 83.88 | 11.33 | 54.96 | 66.53 |
| LZ-111 | 21.73 | 88.43 | 11.06 | 50.91 | 65.92 |
| LZ-88 | 22.92 | 93.26 | 10.92 | 47.64 | 65.89 |
| LZ-80 | 20.11 | 81.83 | 11.09 | 55.15 | 65.82 |
| LZ-72 | 20.44 | 83.18 | 11.00 | 53.83 | 65.57 |
| LZ-74 | 22.51 | 91.59 | 10.81 | 48.02 | 65.45 |
| LZ-49 | 22.68 | 92.29 | 10.77 | 47.49 | 65.41 |
| LZ-90 | 20.47 | 83.32 | 10.91 | 53.26 | 65.28 |
| LZ-50 | 23.08 | 93.94 | 10.56 | 45.74 | 65.02 |
| LZ-60 | 19.10 | 77.73 | 10.66 | 55.81 | 64.58 |
| LZ-106 | 22.40 | 91.15 | 10.39 | 46.37 | 64.28 |
| LZ-61 | 15.47 | 62.94 | 10.08 | 65.13 | 64.25 |
| LZ-114 | 20.27 | 82.49 | 10.50 | 51.79 | 64.07 |
| LZ-73 | 20.37 | 82.90 | 10.48 | 51.46 | 64.04 |
| LZ-65 | 21.32 | 86.73 | 10.19 | 47.81 | 63.38 |
| LZ-52 | 18.92 | 76.98 | 10.26 | 54.25 | 63.34 |
| LZ-58 | 13.30 | 54.11 | 9.13 | 68.68 | 62.85 |
| LZ-75 | 23.31 | 94.86 | 9.53 | 40.87 | 62.47 |
| LZ-107 | 22.75 | 92.56 | 9.40 | 41.32 | 61.82 |
| LZ-105 | 20.94 | 85.19 | 9.50 | 45.36 | 61.29 |
| LZ-103 | 21.02 | 85.53 | 9.48 | 45.10 | 61.27 |
| LZ-63 | 6.45 | 26.24 | 5.21 | 80.80 | 58.98 |

**Supplement Table III** The separation and purification effect of MAR mixed bed (two resins) on resveratrol

| MAR | *Qa* (mg/g) | *F* (%) | *Qd* (mg/g) | *D* (%) | *SC* (%) |
| --- | --- | --- | --- | --- | --- |
| LZ-94 | 22.92 | 92.05 | 13.79 | 60.18 | 72.93 |
| LZ-94+ LZ-78 | 23.84 | 95.74 | 15.67 | 65.74 | 77.74 |
| LZ-94+ LZ-64 | 23.37 | 93.85 | 15.05 | 64.38 | 76.16 |
| LZ-94+ LZ-76 | 23.23 | 93.30 | 14.31 | 61.61 | 74.28 |
| LZ-94+ LZ-77 | 22.82 | 91.65 | 14.24 | 62.39 | 74.10 |
| LZ-94+ LZ-68 | 23.29 | 93.53 | 14.17 | 60.86 | 73.93 |
| LZ-94+ LZ-53 | 23.34 | 93.76 | 13.94 | 59.72 | 73.33 |
| LZ-78 | 21.62 | 86.83 | 13.76 | 63.63 | 72.91 |
| LZ-78+ LZ-63 | 23.50 | 94.38 | 15.45 | 65.72 | 77.19 |
| LZ-78+ LZ-64 | 22.55 | 90.54 | 14.90 | 66.07 | 75.86 |
| LZ-78+ LZ-68 | 21.98 | 88.26 | 14.50 | 65.99 | 74.90 |
| LZ-78+ LZ-77 | 22.88 | 91.90 | 14.40 | 62.92 | 74.51 |
| LZ-78+ LZ-53 | 22.93 | 92.09 | 14.38 | 62.69 | 74.45 |

**Supplement Table IV** The separation and purification effect of MAR mixed bed (three resins) on resveratrol

| MAR | *Qa* (mg/g) | *F* (%) | *Qd* (mg/g) | *D* (%) | *SC* (%) |
| --- | --- | --- | --- | --- | --- |
| LZ-94+ LZ-78 | 19.78 | 91.92 | 12.75 | 64.44 | 75.43 |
| LZ-94+ LZ-78+ LZ-76 | 20.09 | 93.38 | 13.36 | 66.50 | 77.25 |
| LZ-94+ LZ-78+ LZ-64 | 19.61 | 91.12 | 12.78 | 65.17 | 75.55 |
| LZ-94+ LZ-78+ LZ-68 | 19.73 | 91.68 | 12.65 | 64.10 | 75.13 |
| LZ-94+ LZ-78+ LZ-77 | 20.21 | 93.93 | 12.61 | 62.36 | 74.99 |
| LZ-94+ LZ-78+ LZ-53 | 19.27 | 89.54 | 12.43 | 64.51 | 74.52 |
| LZ-78+ LZ-76 | 19.54 | 90.81 | 11.22 | 57.43 | 70.78 |
| LZ-78+ LZ-76+ LZ-64 | 20.42 | 94.88 | 12.75 | 62.46 | 75.43 |
| LZ-78+ LZ-76+ LZ-77 | 17.30 | 80.41 | 10.01 | 57.87 | 66.89 |
| LZ-78+ LZ-76+ LZ-68 | 17.51 | 81.35 | 9.28 | 53.00 | 64.34 |
| LZ-78+ LZ-76+ LZ-53 | 17.02 | 80.87 | 9.76 | 56.35 | 66.16 |

**Supplement Table V** The separation and purification effect of MAR mixed bed (four resins) on resveratrol

| MAR | *Qa* (mg/g) | *F* (%) | *Qd* (mg/g) | *D* (%) | *SC* (%) |
| --- | --- | --- | --- | --- | --- |
| LZ-94+ LZ-78+ LZ-76 | 20.71 | 83.37 | 14.08 | 67.97 | 74.13 |
| LZ-78+ LZ-76+ LZ-64 | 20.55 | 82.66 | 13.47 | 65.56 | 72.40 |
| LZ-94+ LZ-78+ LZ-76+ LZ-64 | 20.74 | 83.50 | 12.97 | 62.57 | 70.94 |
| LZ-94+ LZ-78+ LZ-76+ LZ-77 | 20.11 | 80.69 | 12.46 | 61.97 | 69.46 |
| LZ-78+ LZ-76+ LZ-64+ LZ-77 | 20.26 | 81.35 | 12.45 | 61.44 | 69.40 |
| LZ-94+ LZ-78+ LZ-76+ LZ-68 | 20.49 | 82.37 | 12.23 | 59.71 | 68.77 |

**Supplement Table VI** The separation and purification effect of MAR mixed bed in different mass proportions

| LZ-94+ LZ-78+ LZ-76 | *Qa* (mg/g) | *F* (%) | *Qd* (mg/g) | *D* (%) | *SC* (%) |
| --- | --- | --- | --- | --- | --- |
| 1/1/1 | 23.98 | 97.21 | 16.23 | 67.92 | 79.63 |
| 2/1/2 | 23.82 | 96.92 | 15.63 | 65.62 | 78.14 |
| 2/2/1 | 23.66 | 96.28 | 15.12 | 63.91 | 76.86 |
| 1/2/2 | 22.59 | 91.93 | 14.91 | 65.99 | 76.37 |
| 1/1/2 | 22.51 | 91.59 | 14.35 | 63.76 | 74.90 |
| 2/1/1 | 22.23 | 90.46 | 14.26 | 64.15 | 74.68 |
| 1/2/1 | 23.49 | 95.61 | 13.53 | 57.58 | 72.79 |
